# Supplementary material for: Phytocannabinoids Reduce Inﬂammation of Primed Macrophages and Enteric Glial Cells
Source: Preprints.org preprint supplement (doi:10.20944/preprints202308.0769.v1), 2023-08-09
Supplement: Supplementary file 1 [file supplementary]

## Supplemental Figures, Table and Sequencing information

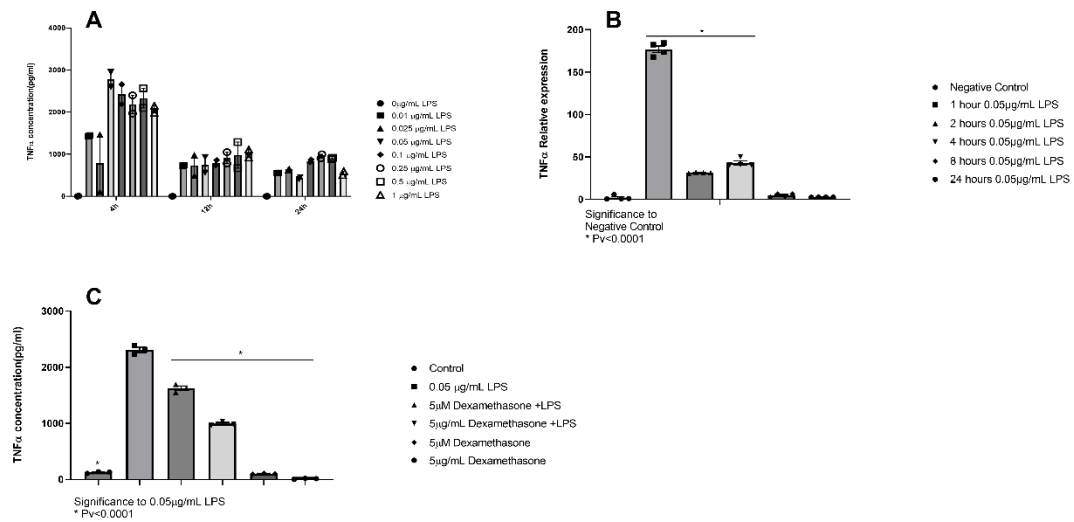

**Figure S1.** Calibration of maximal LPS induced TNF $\alpha$  secretion and expression in J77A1 macrophages and maximal reduction of TNF $\alpha$  by dexamethasone.

Macrophages were incubated with different concentration of LPS and media was removed for analysis at different times. A. 0.01-1  $\mu$ g/mL LPS at 4, 12 and 24h, B. TNF $\alpha$  relative expression with 0.05  $\mu$ g/mL at 1, 2, 4, 8, 24h, measured by RTqPCR. C. concentration of 5  $\mu$ M and 5  $\mu$ g/mL were added to cells with or w/o incubation of 4h with LPS. n=4, all samples were compared to positive control Dunnett's multiple comparison test.

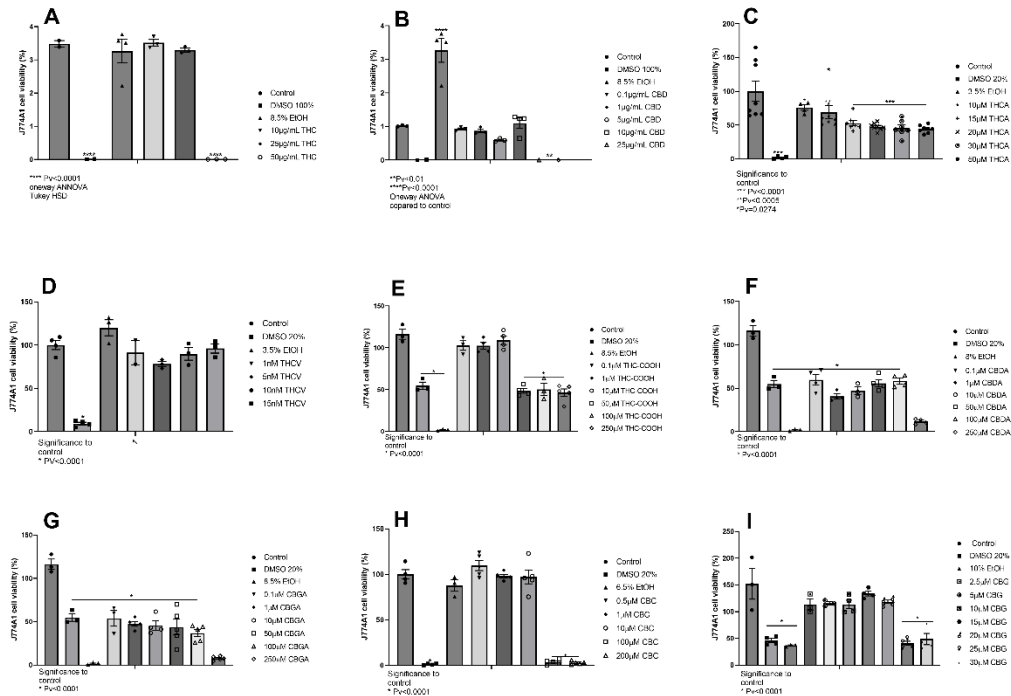

**Figure S2.** Cell viability on J774A1 cells were incubated with medium containing synthetic cannabinoids for 24h and then placed for 2h with 0.5mg/mL MTT 3-(4,5-dimethylthiazol-2-yl)-2,5-diphenyltetrazolium bromide. Non-treated cells served as positive control 100% DMSO-negative control, all cannabinoids were dissolved in EtOH, EtOH was added to volume equivalent to the highest cannabinoid. Absorbance was read at 550nm. A. 10-50μg/mL THC, B. 0.1-25μg/mL CBD, C. 10-50μM THCA, D. 1-15nM THCV, E. 0.1-250μM THC-COOH, F. 0.1-250μM CBDA, G. 0.1-250μM CBGA, H. 0.05-200μM CBC, I. 2.5-30μM CBG. n=4, all samples were compared to positive control Dunnett's multiple comparison test.

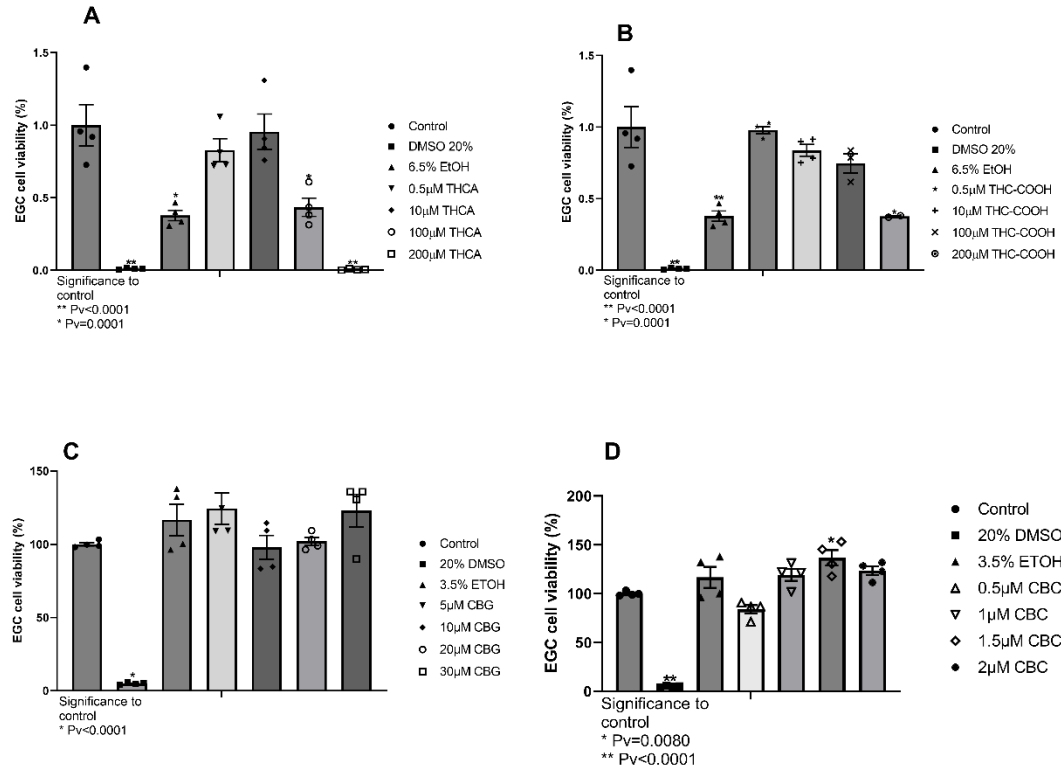

**Figure S3.** Cell viability on EGCs were incubated with medium containing synthetic cannabinoids for 24h and then placed for 2h with 0.5mg/mL MTT 3-(4,5-dimethylthiazol-2-yl)-2,5-diphenyltetrazolium bromide. Non-treated cells served as positive control 100% DMSO-negative control, all cannabinoids were dissolved in EtOH, EtOH was added to volume equivalent to the highest cannabinoid. A. 0.5-200  $\mu$ M THCA, B. 0.5-200  $\mu$ M THC-COOH, C. 5-30  $\mu$ M CBG, 0.5-2  $\mu$ M CBC. . n=4, all samples were compared to positive control Dunnett's multiple comparison test.

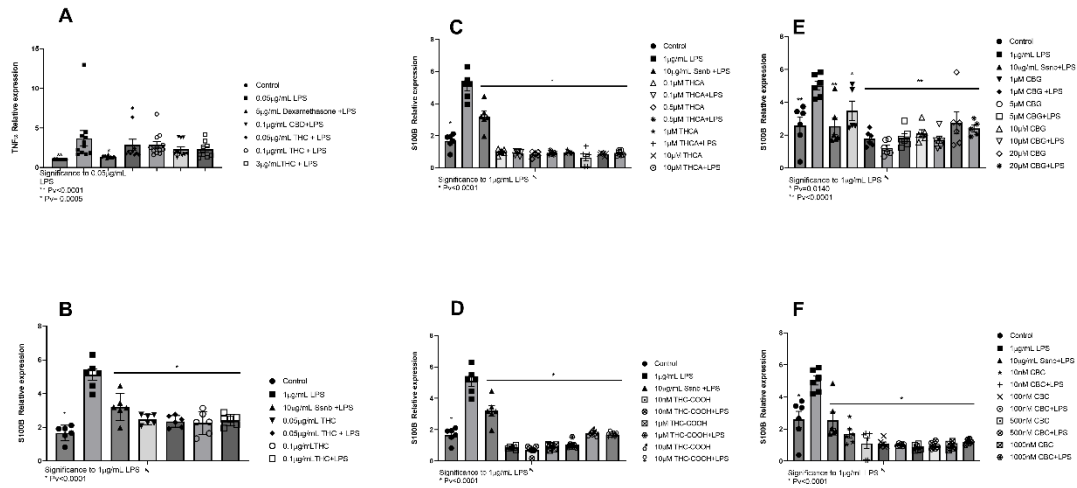

**Figure S4.** J774A1 and EGC were incubated for 1h with synthetic cannabinoids and then with 0.05  $\mu$ g/mL LPS for J774A1 and 0.1  $\mu$ g/mL for EGC. Dexamethasone was used as positive control for J774A1 cells and Ssnb for EGC. Relative expression was measured using RTqPCR. A. Relative expression of *Tnfa* gene after incubation with 0.1-3  $\mu$ g/mL THC and 1  $\mu$ g/mL LPS, B. Relative expression of *S100B* gene after incubation with 0.05-0.1  $\mu$ g/mL THC with and w/o 1  $\mu$ g/mL LPS. C. Relative expression of *S100B* after incubation with 0.01-10  $\mu$ M THCA with and w/o 1  $\mu$ g/mL LPS. D. Relative expression of *S100B* after incubation with 10 nM-10  $\mu$ M of THC-COOH with or w/o 1  $\mu$ g/mL LPS. E. Relative expression of *S100B* after incubation with 1-20  $\mu$ M of CBC with or w/o 1  $\mu$ g/mL LPS. F. Relative expression of *S100B* after incubation with 10-1000 nM CBC with or w/o 1  $\mu$ g/mL LPS. A n=12, B-F n=6. All samples were compared to positive control Dunnett's multiple comparison test.

**Table S1.** Primers used for RTqPCR

| <b>Name</b>    | <b>Forward</b>            | <b>Reverse</b>              | <b>Accession</b> |
|----------------|---------------------------|-----------------------------|------------------|
| m-PPIA         | GGGTCCTCCTTTCACAGA<br>A   | GATGCCAGGACCTGTATG<br>CT    | NM_008907        |
| m-TNF $\alpha$ | GTCTGTGCCTCAGCCTCTTC      | GCTTGGTGGTTTGCTACG<br>AC    | U68414.1         |
| r-GAPDH        | TGAGGTGACCGCATCTTCT<br>TG | TGGTAACCAGGCGTCCGA<br>TA    | AF106860.2       |
| r- S100B       | CAGGAGCCTCCGGATGT         | TCCTGCTCTTTGATTTTCCT<br>CCA | NM_013191.<br>2  |
| r-GFAP         | TCCTGGAACAGCAAAACA<br>AG  | CAGCCTCAGGTTGGTTTC<br>AT    | Z48978.1         |

All sequencing data (GEO Submission (GSE240225) [NCBI tracking system  
#24220033] is available at

<https://www.ncbi.nlm.nih.gov/geo/query/acc.cgi?acc=GSE240225>
